# Supplementary material for: The secreted endoribonuclease ENDU-2 from the soma protects germline immortality in C. elegans
Source: PubMed Central journal article supplement (PMC7904951; doi:10.1038/s41467-021-21516-6), 2021-02-24
Supplement: 41467_2021_21516_MOESM1_ESM.pdf [file 41467_2021_21516_MOESM1_ESM.pdf]

## Supplementary Figure 1

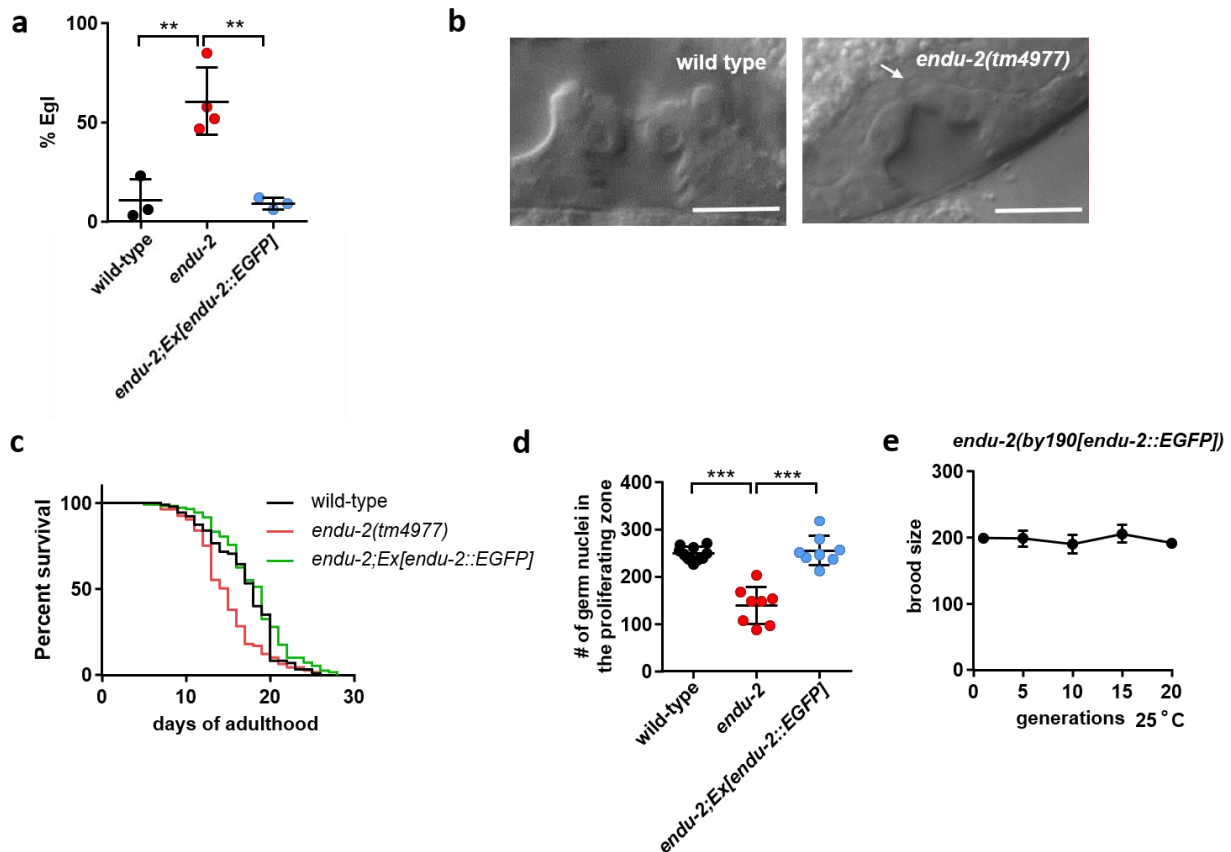

### Supplementary Fig. 1: *endu-2* mutants phenotypes and their rescue with extrachromosomal *endu-2::EGFP* transgene.

a) Extrachromosomal *endu-2::EGFP* transgene rescues egg-laying defects (Egl) of *endu-2(tm4977)* mutants at 20°C. Data are mean ± SD. Number of animals examined over 3 independent experiments n=180 for each strains. Unpaired t test was used to calculate the two-tailed P-values. \*\* means 0.001 < P-value < 0.01. P-value for *endu-2(tm4977)* vs. wild-type: 0.0069, for *endu-2(tm4977)* vs. *endu-2;Ex[endu-2::EGFP]*: 0.0038.

b) *endu-2(tm4977)* L4 animals show defective vulva development. The arrow points to the unfused anchor cell. Similar results were obtained in 4 independent experiments. Scale bar: 10 μm.

c) Extrachromosomal *endu-2::EGFP* transgene rescues short lifespan of *endu-2(tm4977)* mutants at 20°C. wild-type: n=83, median survival 18 days, *endu-2(tm4977)*: n=105, median survival 15 days, *endu-2(tm4977);Ex[endu-2::EGFP]*: n=107, median survival 19 days.

d) Extrachromosomal *endu-2::EGFP* transgene rescues reduced germline proliferation of *endu-2(tm4977)* mutants at 20°C. wild-type: n=10, *endu-2(tm4977)*: n=8, *endu-*

*2(tm4977);Ex[endu-2::EGFP]*: n=8. Data are mean  $\pm$  SD. Unpaired t test was used to calculate the two-tailed P-values. \*\*\* means P-value < 0.0001.

e) The CRISPR EGFP knock-in animals do not show Mrt phenotype at 25°C. Data are mean  $\pm$  SD. Number of animals examined over 3 independent experiments n=15 for each generation.

All the rescue experiments in this figure were performed with BR7295 *endu-2(tm4977);byEx1375[endu-2P::endu-2::EGFP; myo-2P::mCherry]*.

This Figure is related to the main Figures 1-2.

## Supplementary Figure 2

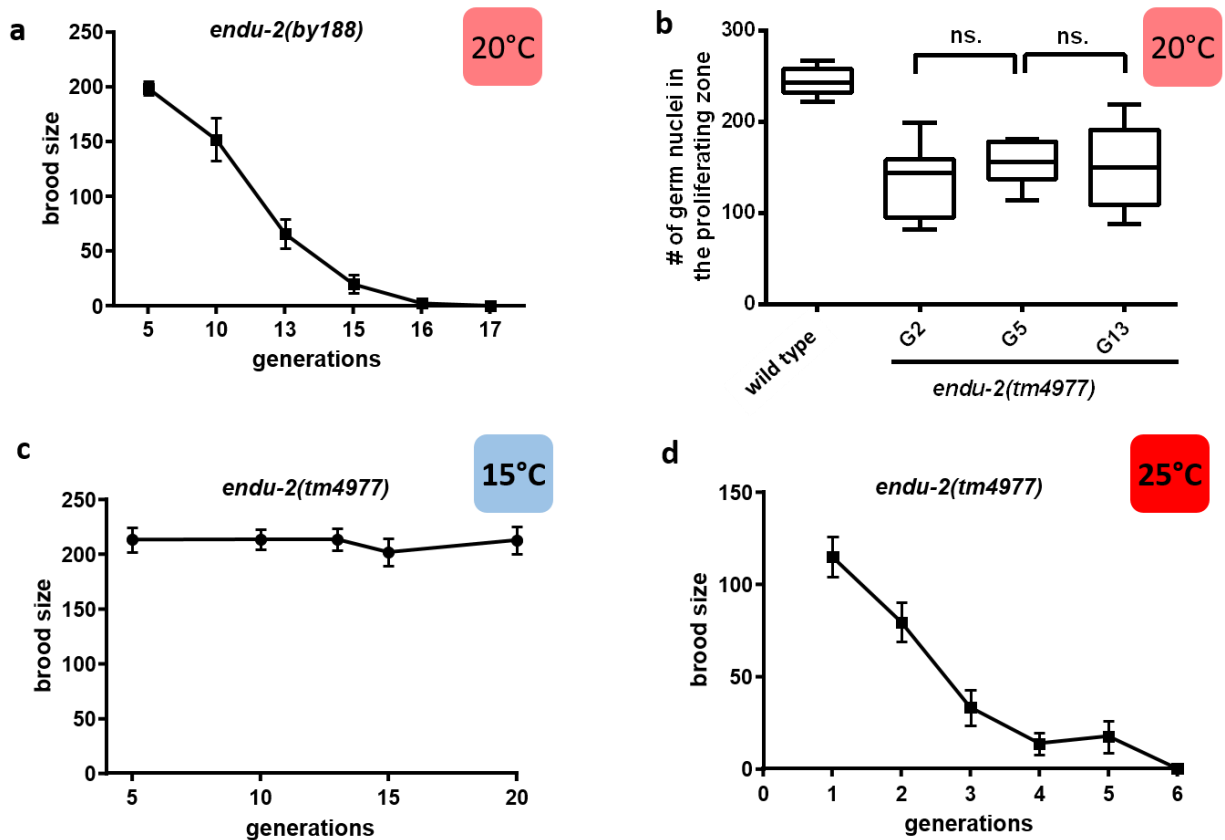

### Supplementary Fig. 2: *endu-2(If)* mutants have a temperature-sensitive Mrt phenotype.

a) *endu-2(by188)* shows gradually reduced brood sizes over generations at 20°C. Data are mean  $\pm$  SD. Number of examined animals  $n=11$  for G5,  $n=13$  for G10 and G13,  $n=15$  for G15-G17.

b) Germline proliferation of *endu-2(tm4977)* mutants does not change over generations. Shown are boxes extending from the 25th to the 75th percentile, with the median indicated by the horizontal line and Min/Max whiskers. Number of examined animals  $n=12$  for wild type, G2 and G13 of *endu-2(tm4977)*,  $n=13$  for G5 of *endu-2(tm4977)* animals. Unpaired t test was used to calculate the two-tailed P-values. P-value for G5 vs. G2: 0.081, G13 vs G5: 0.9741.

c) *endu-2(tm4977)* does not exhibit Mrt phenotype at 15°C. Data are mean  $\pm$  SD. Number of examined animals  $n=14$  for G5,  $n=15$  for G10,  $n=12$  for G13,  $n=16$  for G15 and  $n=14$  for G20.

d) Mrt phenotype of *endu-2(tm4977)* is enhanced at 25°C. Data are mean  $\pm$  SD. Number of examined animals n=15 for G1 and G2, n=12 for G3, n=15 for G4-G6.

This Figure is related to the main Figure 1.

## Supplementary Figure 3

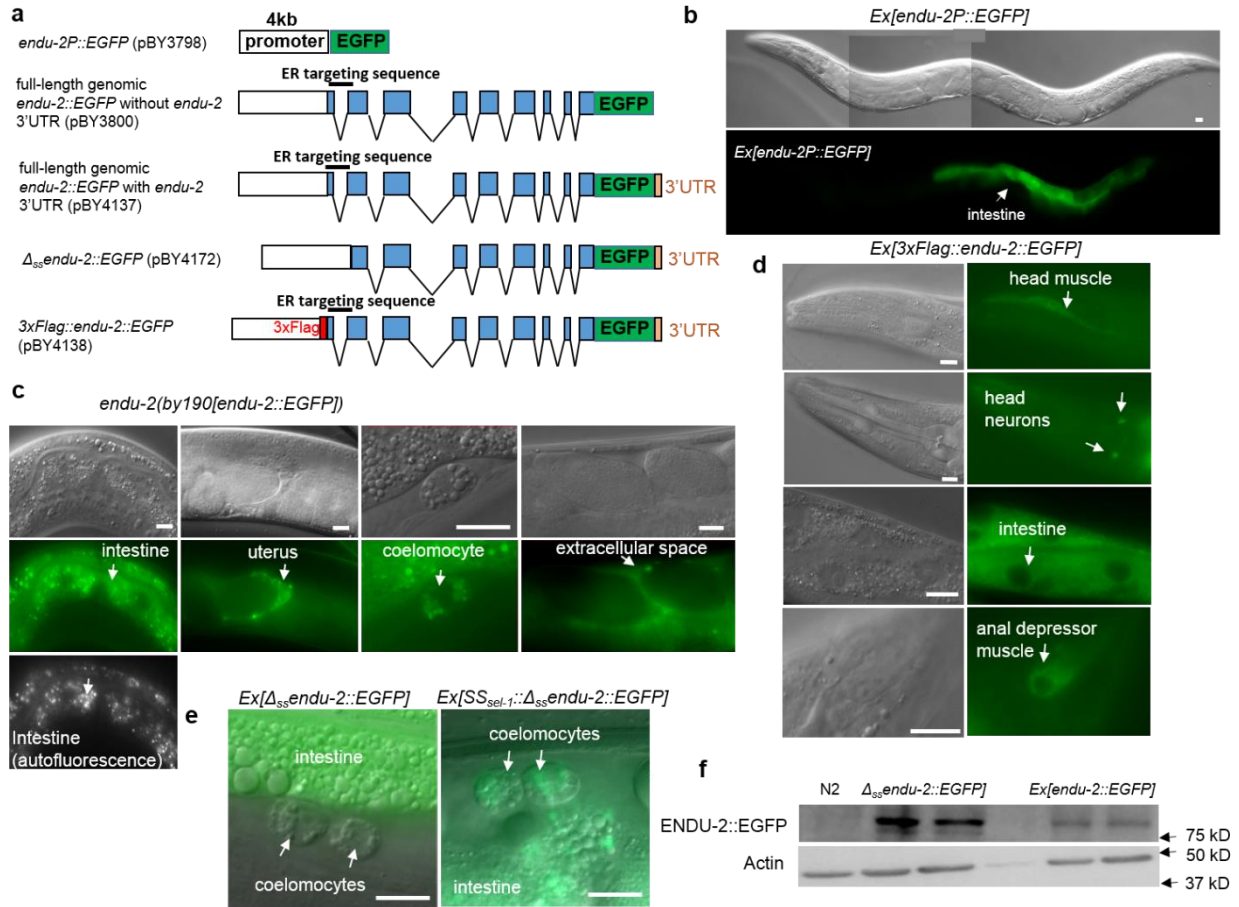

### Supplementary Fig. 3: Expression pattern of *endu-2*

a) Summary of the transcriptional and translational fusion reporters of *endu-2* used for study expression and protein localization. All the transgenic strains generated for this study are listed in the Supplementary Data 5.

b) The EGFP transcriptional fusion reporter *byEx1315[endu-2P::EGFP]* shows intestinal expression. Similar expression pattern was observed in 3 independent experiments.

c) The EGFP CRISPR-Cas9 knock-in strain *endu-2(by190[endu-2::EGFP])* displays weak ENDU-2::EGFP localization in the intestine, somatic gonad, coelomocyte and extracellular space. Similar expression pattern was observed in more than 5 independent experiments.

d) Localization of 3xFlag::ENDU-2::EGFP (*byEx1805[endu-2P::3xFlag::endu-2::EGFP::endu-2'3'UTR]*) in the intestine, head neurons, muscle cells in the head region and anal depressor muscle. Similar expression pattern was observed in 3 independent experiments.

e) Intestinally expressed  $\Delta_{ss}$ ENDU-2::EGFP (BR7512 *endu-2(tm4977);byEx1449[endu-2P:: $\Delta_{ss}endu-2::EGFP]$* ) is not detected in the coelomocyte while fusion of the predicted secretion signal peptide (1-20 amino acids) of SEL-1 to the N-terminal of  $\Delta_{ss}$ ENDU-2::EGFP (BR8821 *endu-2(tm4977);byEx1875[endu-2P::SS<sub>sel-1</sub>:: $\Delta_{ss}endu-2::EGFP]$* ) results in its localization in the coelomocytes. Similar expression pattern was observed in 3 independent experiments.

f) Western Blot to detect localization of transgenically expressed ENDU-2(wt)::EGFP and  $\Delta_{ss}$ ENDU-2::EGFP. Shown are two replicates with 10 day one adult animals of BR8657 *endu-2(tm4977);byEx1814[endu-2P::endu-2::EGFP::endu-2'3'UTR]* and BR8747 *endu-2(tm4977);byEx1847[endu-2P:: $\Delta_{ss}endu-2::EGFP::endu-2'3'UTR]$*  at 25°C. Wild type animals were used as negative control. Similar results were observed in three biological replicates. The uncropped blots are included in the Supplementary Fig. 11a.

Scale bar 10  $\mu$ m. This Figure is related to the main Figure 2.

## Supplementary Figure. 4

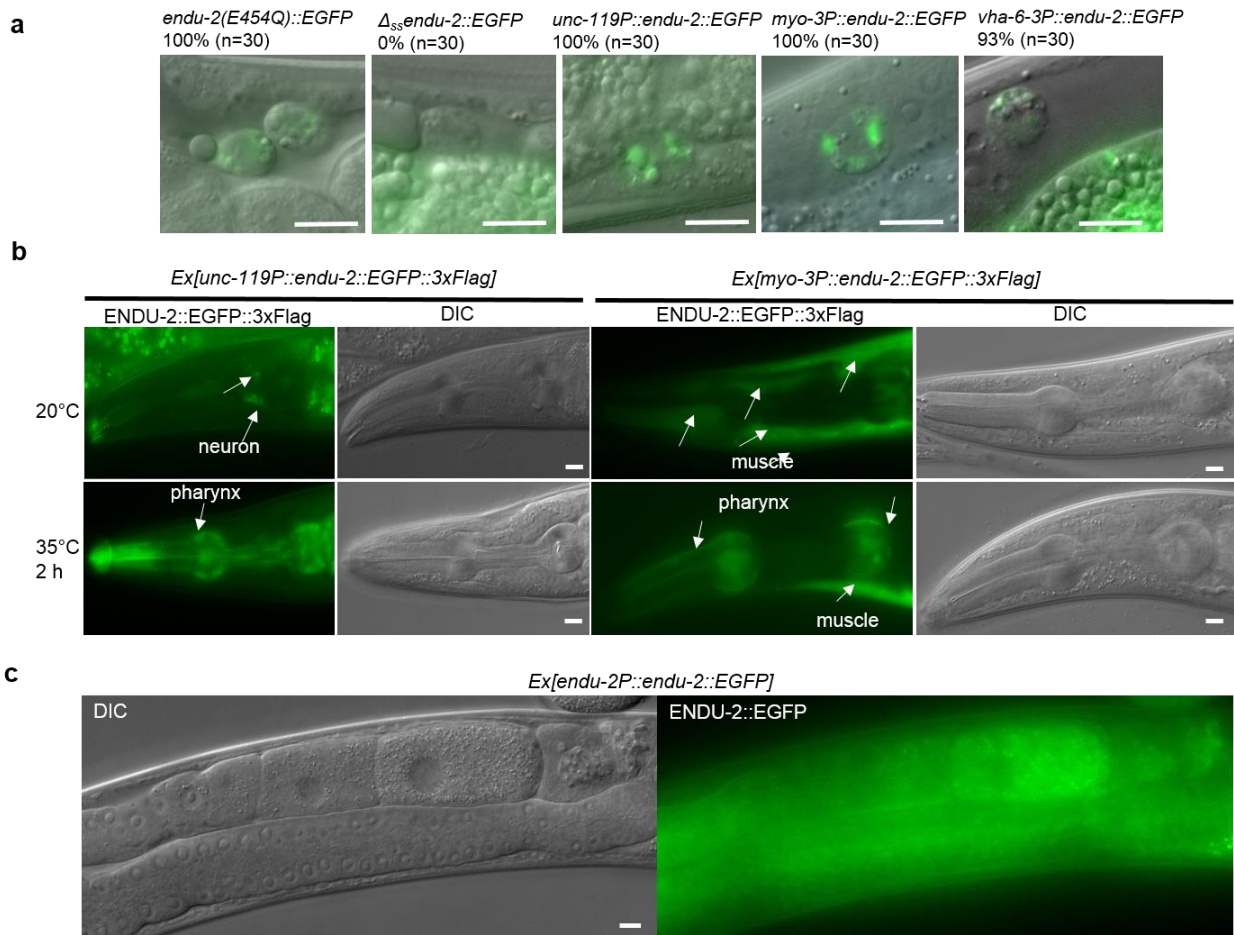

### Supplementary Fig. 4: ENDU-2::EGFP is a secreted protein

- a) Accumulation of secreted ENDU-2::EGFP in the coelomocytes. N=3 biological replicates.
- b) Heat stress leads to increased pharyngeal accumulation of ENDU-2::EGFP expressed from neurons and muscle cells. N=3 biological replicates.
- c) Extra-chromosomal *endu-2::EGFP* transgene results in a weak ENDU-2::EGFP signal in the oocytes (9%, n=100). N=4 biological replicates.

Scale bar 10  $\mu$ m. This Figure is related to the main Figure 2.

## Supplementary Figure 5

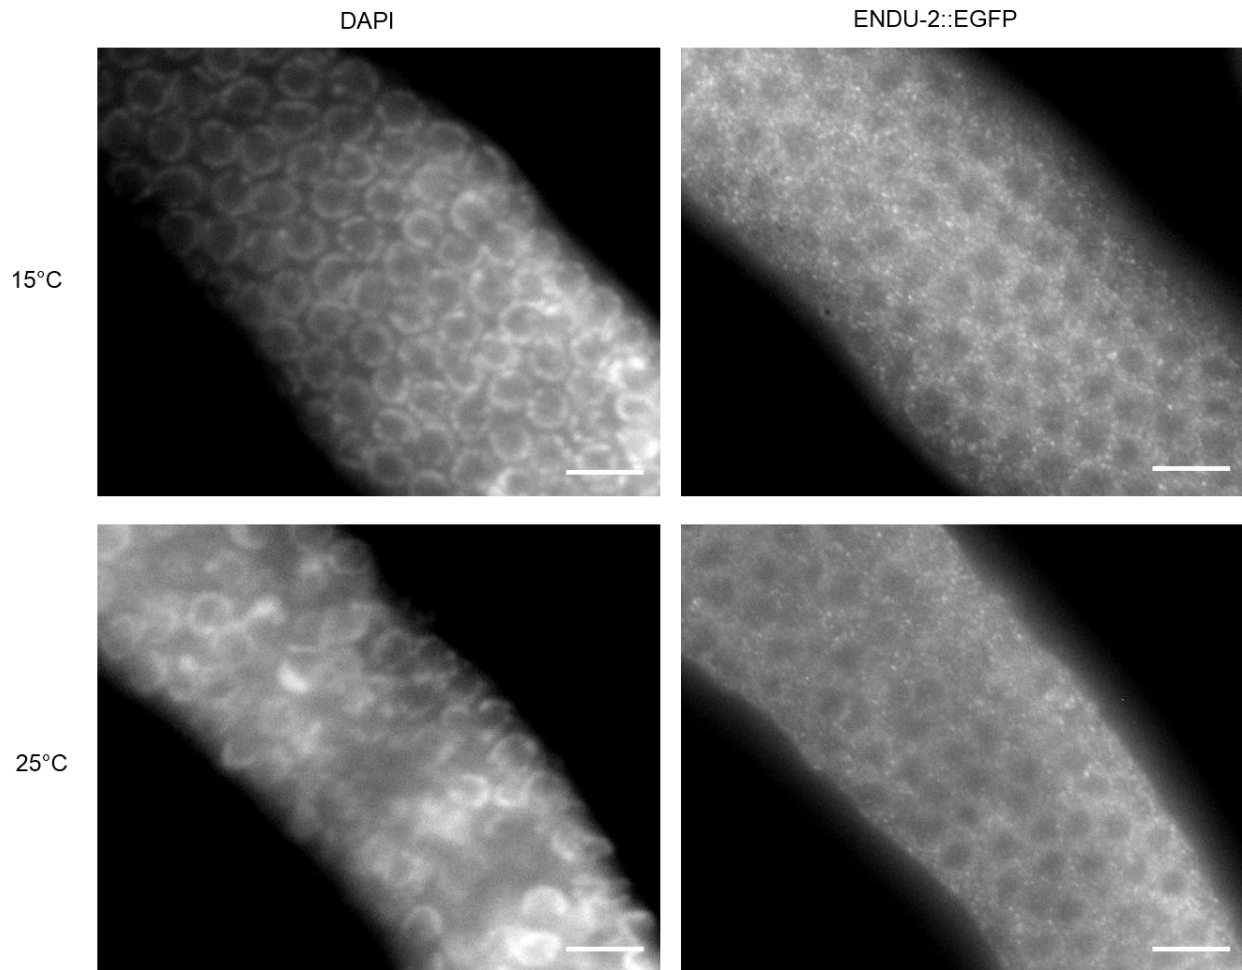

### Supplementary Fig. 5: ENDU-2::EGFP is localized in the germline at both 15°C and 25°C.

ENDU-2::EGFP in *endu-2(by190[endu-2::EGFP])* was detected with GFP antibody. Scale bar 10  $\mu$ m. N=3 replicates

This Figure is related to the main Figure 2.



## Supplementary Figure 6

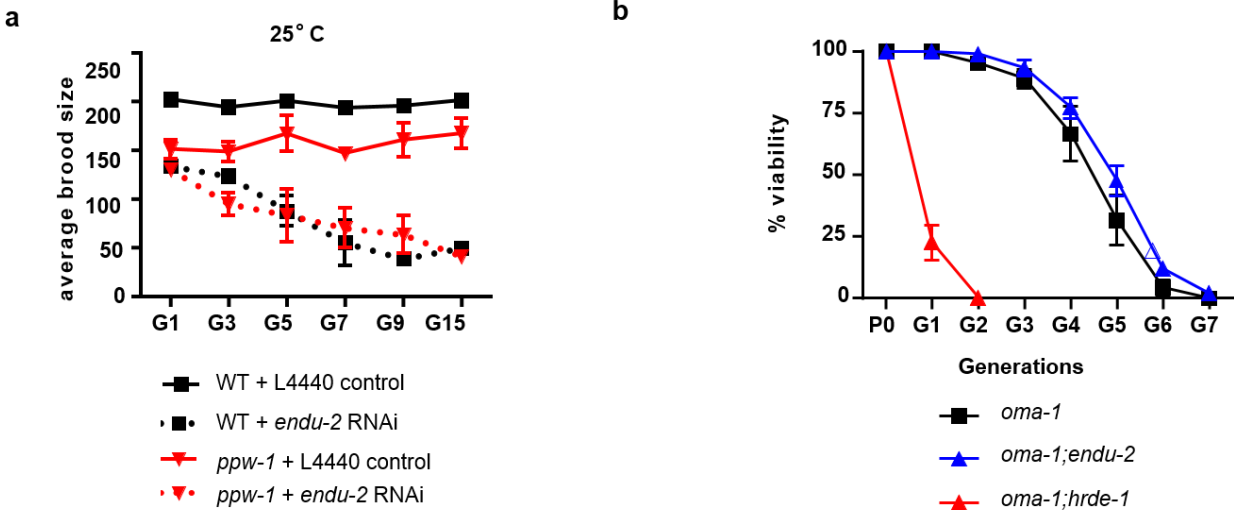

### Supplementary Fig. 6: Somatic expressed ENDU-2 affects reproduction without affecting multigenerational inheritance of *oma-1* RNAi in the germline.

a) *endu-2* RNAi causes gradually reduced brood size in both wild type and *ppw-1*(*pk1425*) animals. Data are mean  $\pm$  SD. Number of animals examined over 3 independent experiments n=15 for each generation.

b) *endu-2*(*tm4977*) mutant animals are not defective in multigenerational inheritance of *oma-1* RNAi in the germline. Data are mean  $\pm$  SEM. Numbers of examined embryos over three independent experiments: *oma-1*(*zu405*): G1 n=316, G2 n=315, G3 n=346, G4 n=376, G5 n=412, G6 n=612, *oma-1*(*zu405*);*endu-2*(*tm4977*): G1 n=336, G2 n=307, G3 n=360, G4 n=323, G5 n=335, G6 n=334, G7 n=492, *oma-1*(*zu405*);*hrde-1*(*tm1200*): G1 n=335, G2 n=206.

This Figure is related to the main Figure 3.

## Supplementary Figure 7

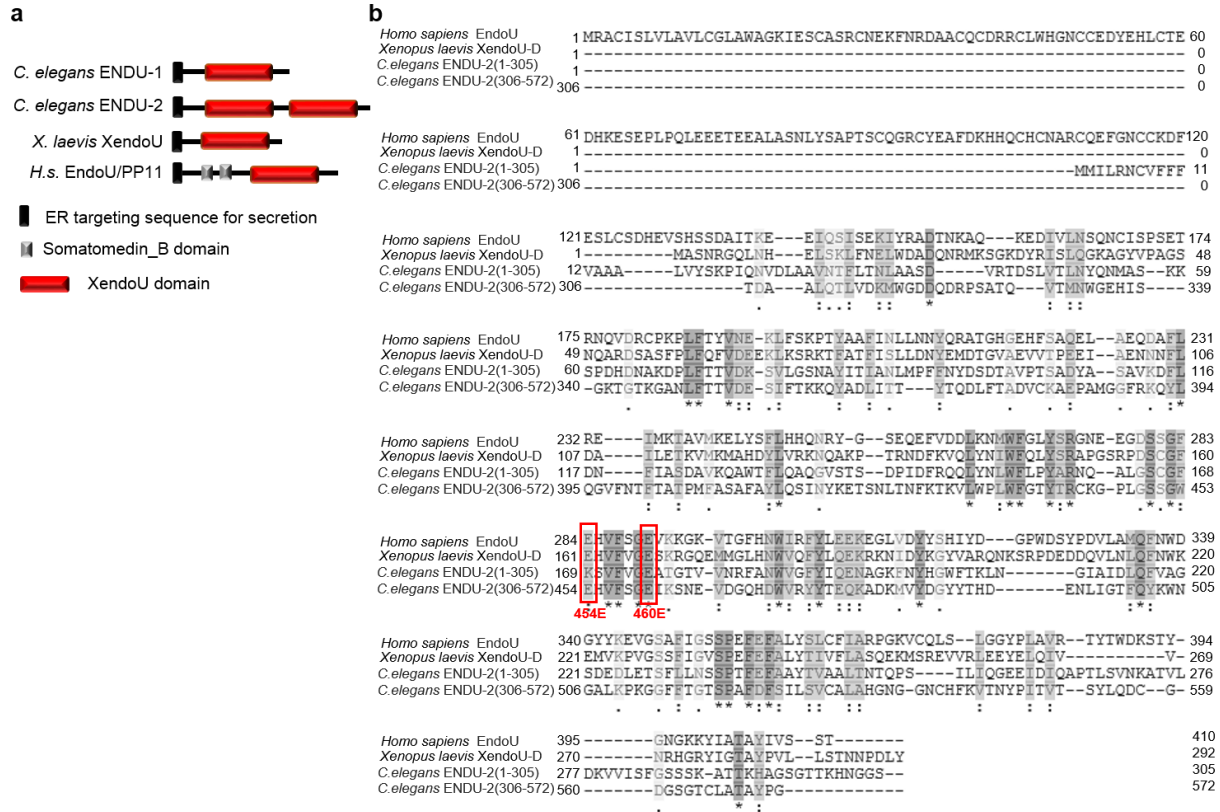

### Supplementary Fig. 7: ENDU-2 is an evolutionarily conserved endoribonuclease

a) Protein domain prediction of EndoU in *C. elegans*, *X. laevis* and *H. sapiens*.

b) Sequence alignment of human EndoU, *Xenopus* XendoU and *C. elegans* ENDU-2 suggests sequence conservation of the XendoU domains from worm to human. As *C. elegans* ENDU-2 has two XendoU domains, the alignment was performed with split protein fragments containing one of the XendoU domains (1-305 and 306-572 amino acids) each.

This Figure is related to the main Figure 4.

## Supplementary Figure 8.

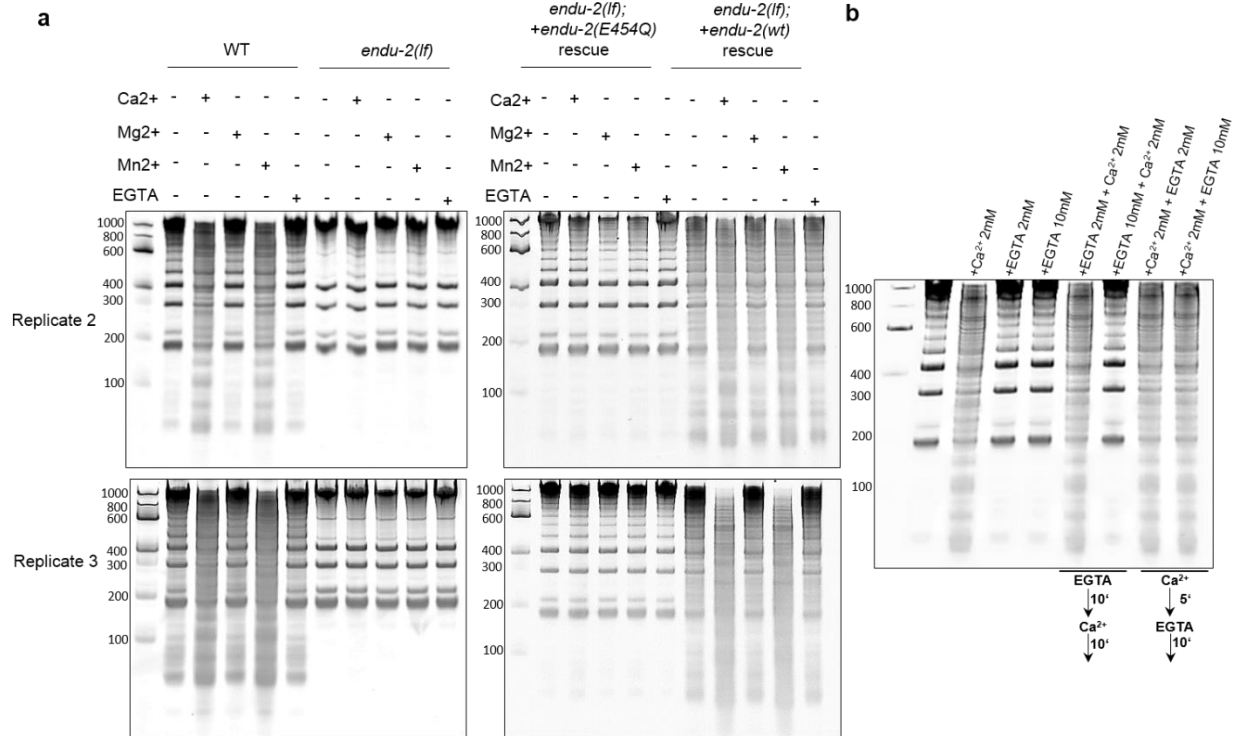

### Supplementary Fig. 8: Ca<sup>2+</sup> and Mn<sup>2+</sup> promote ENDU-2 mediated RNA decay.

a) Two additional biological replicates showing ENDU-2 mediated bulk RNA decay in the presence of Ca<sup>2+</sup> and Mn<sup>2+</sup>. N=3 independent experiments.

b) Incubation with Ca<sup>2+</sup> results in decay of total RNA isolated from wild type animals. This effect is blocked by pre-incubation with EGTA. N=3 independent experiments.

This Figure is related to the main Figure 4.

## Supplementary Figure 9.

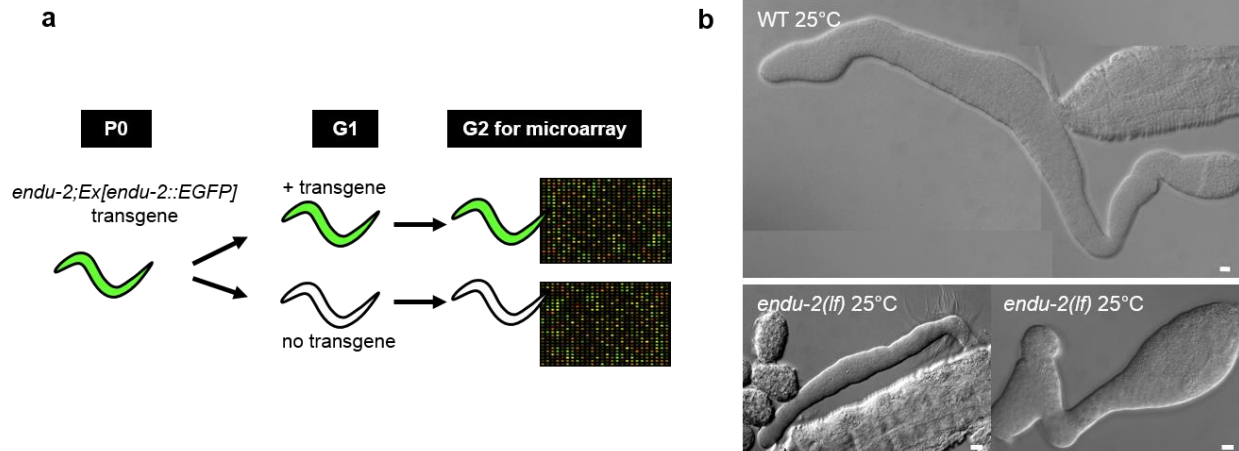

### Supplementary Fig. 9: Transcriptomic analysis with microarray

a) Schematic diagram of strain preparations for microarray analyses. The G2 granddaughter generation from one single *endu-2(lf); Ex[endu-2::EGFP]* was used for transcriptome analysis.

b) Gonad of *endu-2(lf)* mutants are smaller than wild type animals at 25°C. Scale bar 10  $\mu$ m. N=3 independent replicates.

This Figure is related to the main Figure 5.

## Supplementary Figure 10.

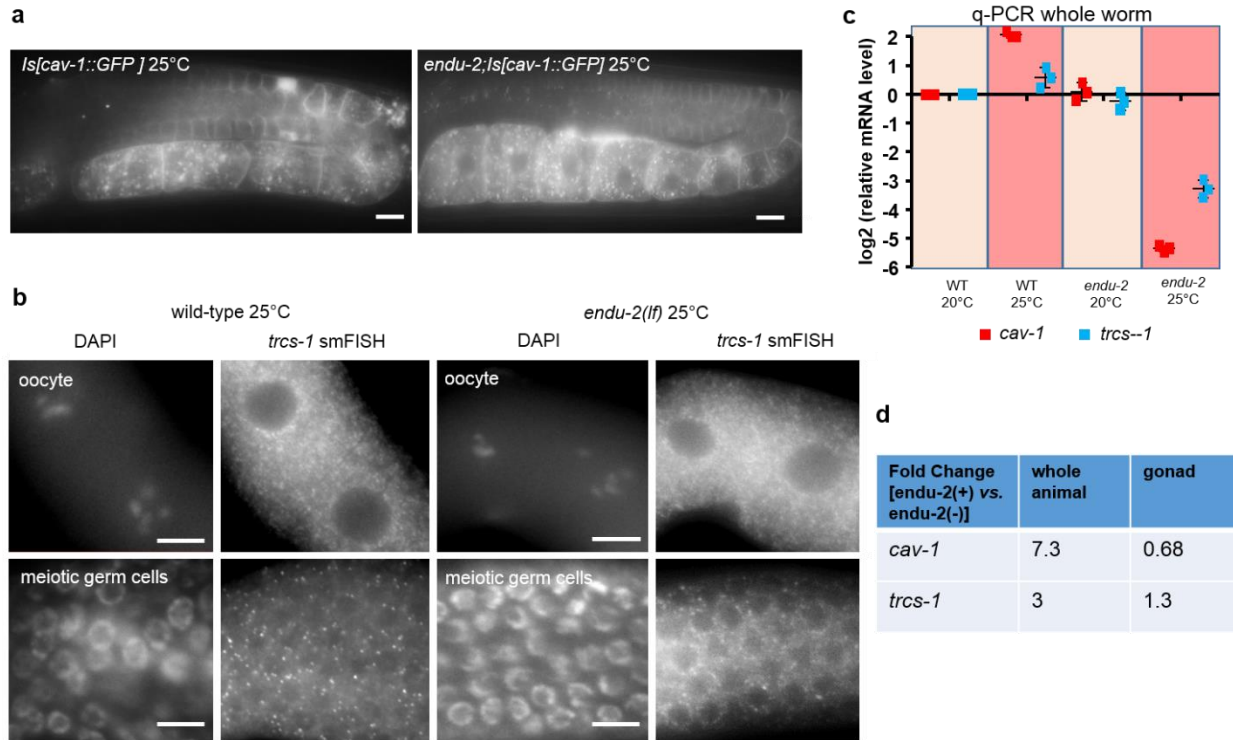

### Supplementary Fig. 10: Comparison of different assays to determine expression levels of ENDU-2 binding targets *cav-1* and *trcs-1* in the germline.

a) ENDU-2 does not significantly affect the expression level of *cav-1::GFP* in the germline. N=3 independent replicates.

b) smFISH staining reveals no significant fold change of *trcs-1* mRNA in the germline upon *endu-2* knock-down. N=3 independent replicates.

c) q-PCR results suggest strongly decreased mRNA level of both *trcs-1* and *cav-1* in the absence of *endu-2* at elevated temperature. Data are mean  $\pm$  SD.

d) Transcriptomic studies reveal distinct *cav-1* and *trcs-1* mRNA levels from RNA extractions of either whole animal or gonad-only origin.

Scale bar 10  $\mu$ m. This Figure is related to the main Figure 5.

## Supplementary Figure 11.

a

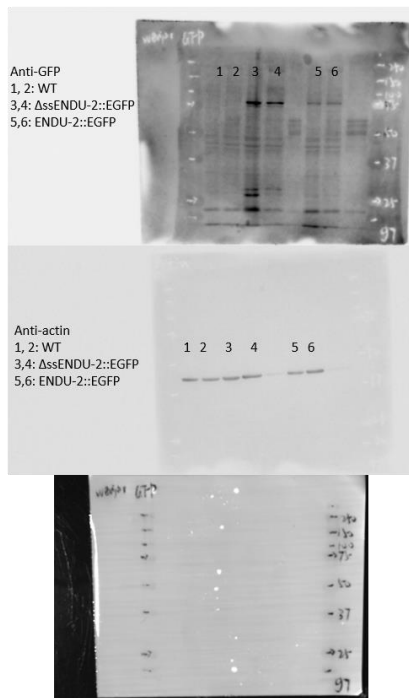

b

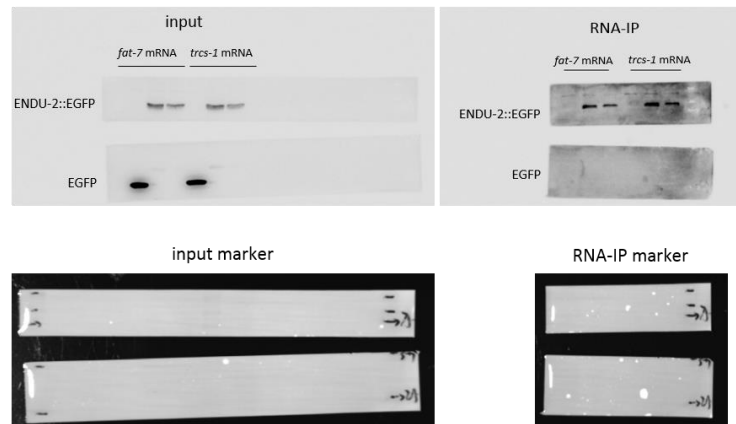

## Supplementary Fig. 11: Uncropped blots for Western blots in this study.

a) Uncropped blots for the Supplementary Fig. 3f.

b) Uncropped blots for the Fig. 4c.
