# Supplementary material for: The secreted endoribonuclease ENDU-2 from the soma protects germline immortality in C. elegans
Source: PubMed Central journal article supplement (PMC7904951; doi:10.1038/s41467-021-21516-6), 2021-02-24
Supplement: 41467_2021_21516_MOESM9_ESM.pdf [file 41467_2021_21516_MOESM9_ESM.pdf]

**Title:** Supplementary Data 1.

**Description:** Summary of RIP-seq results Description: Summary of the transcripts that co-immunoprecipitate with ENDU-2(E454Q)::EGFP.

**Title:** Supplementary Data 2.

**Description:** Summary of microarray result Description: Differentially expressed genes in *endu-2(tm4977)* vs. *endu-2(tm4977)*; *byEx1375[endu2P::endu-2::EGFP]* at 25°C.

**Title:** Supplementary Data 3.

**Description:** Summary of the gonadal RNA-Seq data. Description: List of genes expressed in the wild type gonad and differentially expressed genes in gonad of *endu-2(tm4977)* vs. wild type at 25°C.

**Title:** Supplementary Data 4.

**Description:** Summary of smFISH probes. Description: Sequences of the smFISH probes to detect *endu-2*, *fat-7* and *trcs-1* mRNA.

**Title:** Supplementary Data 5.

**Description:** Transgenic strains generated in this study. Description: Summary of all the transgenic animals generated for this study.
